# Supplementary material for: Human Leukocyte Antigen Class II Alleles Are Associated with Hepatitis C Virus Natural Susceptibility in the Chinese Population
Source: PubMed Central journal article supplement (PMC4581170; doi:10.3390/ijms160816792), 2015-07-23
Supplement: ijms-16-16792-s001.pdf [file ijms-16-16792-s001.pdf]

## Supplementary Information

**Table S1.** Information of primers and probes for TaqMan allelic discrimination.

| SNPs (Genotype) | Nearby Gene        | Region     | MAF <sup>a/b</sup> | TaqMan-MGB Probe/Primers Sequences (5'-3')                                                                                                                              |
|-----------------|--------------------|------------|--------------------|-------------------------------------------------------------------------------------------------------------------------------------------------------------------------|
| rs3077 C>T      | HLA-DPA1           | 3-UTR      | 0.352/0.378        | Probe-C: FAM-AAACTACCCCAGTGGC-MGB<br>Probe-T: HEX-AAACTACTCCAGTGGCT-MGB<br>Forward primer: TCAGCTTTTCTTCTCACTTCATGTG<br>Reverse primer: GAGCTTGAAGGGTCAGCAATC           |
| rs2395309 G>A   | HLA-DOA  HLA-DPA1  | N/A        | 0.355/0.378        | Probe-G: FAM-CAGATAGTTGTAAGTGAGATG-MGB<br>Probe-A: HEX-CAGATAGTTATAAGTGAGATGG-MGB<br>Forward primer: GGTCTTATCCAGTTGGTGGTCAA<br>Reverse primer: AGAGGGCTATGGGAAGAGAATGA |
| rs2856718 T>C   | HLA-DQB1  HLA-DQA2 | Intergenic | 0.471/0.475        | Probe-T: FAM-AGAGCTGTTTAATCC-MGB<br>Probe-C: HEX-AGAGCTGTCTAATCC-MGB<br>Forward primer: GAGCTCCCTCTGGCAGGTT<br>Reverse primer: TATGCTTTCACCAACTTCCTTCAC                 |

MAF: minor allele frequency. <sup>a</sup> minor allele frequencies in control group; <sup>b</sup> minor allele frequencies from HapMap of Han Chinese in Beijing, China (CHB) (dbSNP, build128; available at <http://www.ncbi.nlm.nih.gov/SNP/>).

**Table S2.** Linkage disequilibrium information of HLA class II single nucleotide polymorphisms.

|           | Group A and Group B <sup>a</sup> |                    |                    | Group (A + B) and Group C <sup>b</sup> |                    |                    |
|-----------|----------------------------------|--------------------|--------------------|----------------------------------------|--------------------|--------------------|
|           | Rs3077                           | Rs2395309          | Rs2856718          | Rs3077                                 | Rs2395309          | Rs2856718          |
| Rs3077    | –                                | 1.0 <sup>c</sup>   | 0.194 <sup>c</sup> | –                                      | 0.993 <sup>c</sup> | 0.16 <sup>c</sup>  |
| Rs2395309 | 0.957 <sup>d</sup>               | –                  | 0.202 <sup>c</sup> | 0.971 <sup>d</sup>                     | –                  | 0.159 <sup>c</sup> |
| Rs2856718 | 0.031 <sup>d</sup>               | 0.036 <sup>d</sup> | –                  | 0.016 <sup>d</sup>                     | 0.016 <sup>d</sup> | –                  |

Group A: HCV persistent female carriers; Group B: HCV natural clearance female subjects; Group C: Healthy female controls; Group (A + B): HCV-infected female patients.

<sup>a</sup> Linkage disequilibrium information of the comparison between “Group A and Group B” with “Group B” served as a control group; <sup>b</sup> Linkage disequilibrium information of the comparison between “Group (A + B) and Group C” with “Group C” served as a control group; <sup>c</sup> D' value; <sup>d</sup> R<sup>2</sup> value.

**Table S3.** Haplotypes frequencies constituted with polymorphisms of HLA class II SNPs among three groups.

| Haplotype <sup>a</sup> | Group A (%)    | Group B (%)    | Group C (%)     | OR (95% CI) <sup>b</sup>        | <i>p</i> <sup>b</sup> | OR (95% CI) <sup>c</sup>   | <i>p</i> <sup>c</sup> |
|------------------------|----------------|----------------|-----------------|---------------------------------|-----------------------|----------------------------|-----------------------|
|                        | <i>n</i> = 740 | <i>n</i> = 388 | <i>n</i> = 1946 | The Outcome: HCV Susceptibility |                       | The Outcome: HCV Clearance |                       |
| CGT                    | 301 (40.7)     | 173 (44.6)     | 809 (41.6)      | 1                               | 1                     | 1                          | 1                     |
| TAC                    | 181 (24.5)     | 89 (22.9)      | 470 (24.1)      | 0.975 (0.804–1.182)             | 0.794                 | 1.094 (0.785–1.525)        | 0.597                 |
| CGC                    | 154 (20.8)     | 69 (17.8)      | 442 (22.7)      | 0.840 (0.687–1.029)             | 0.092                 | 1.194 (0.835–1.707)        | 0.332                 |
| TAT                    | 99 (13.4)      | 53 (13.7)      | 212 (10.9)      | 1.277 (1.001–1.630)             | 0.050                 | 1.190 (0.794–1.782)        | 0.399                 |
| Others <sup>d</sup>    | 5 (0.6)        | 4 (1.0)        | 13 (0.7)        | 0.904 (0.377–2.169)             | 0.821                 | 0.417 (0.108–1.611)        | 0.205                 |

SNPs: single nucleotide polymorphisms, Group A: HCV persistent carriers; Group B: HCV natural clearance subjects; Group C: Healthy controls; Group (A + B): HCV-infected patients; <sup>a</sup> Order of single nucleotide polymorphisms comprising the HLA class II haplotypes: rs3077, rs2395309 and rs2856718; <sup>b</sup> Logistic regression model, adjusted by age, and route of infection for Group (A + B) *versus* Group C; <sup>c</sup> Logistic regression model, adjusted by gender, age, route of infection, and viral genotype for Group A *versus* Group B; <sup>d</sup> Haplotypes with a frequency of less than 5% were combined with others.
